# Supplementary material
Source: Springer Nature journal article supplement (https://www.springermedizin.de/resource/supplementary/12936_2009_1148_MOESM4_ESM.pdf/9549972)

*An. gambiae*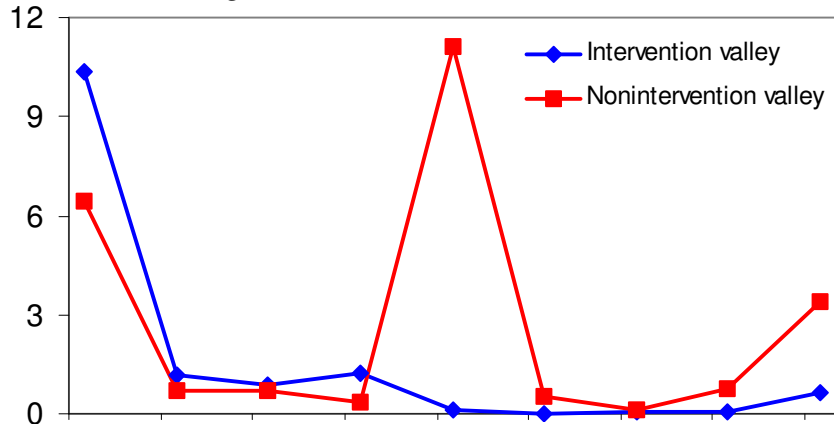*An. funestus*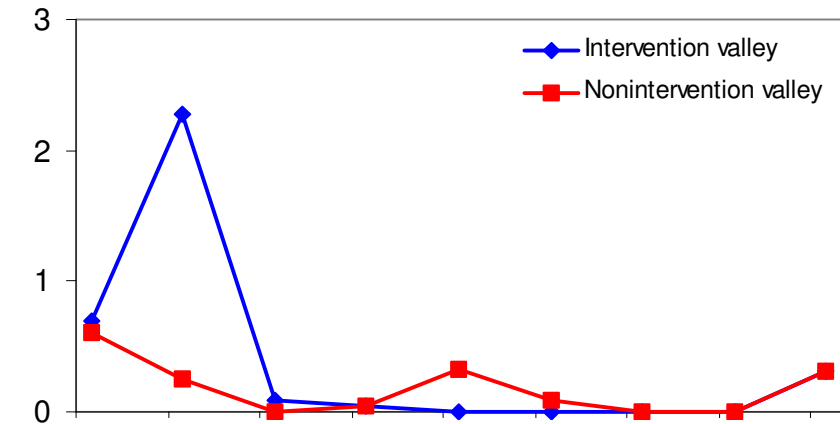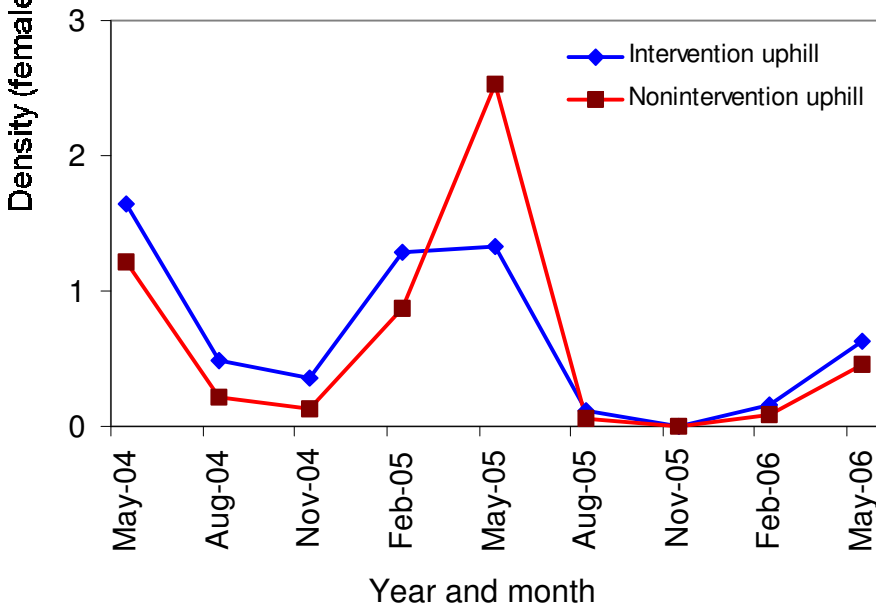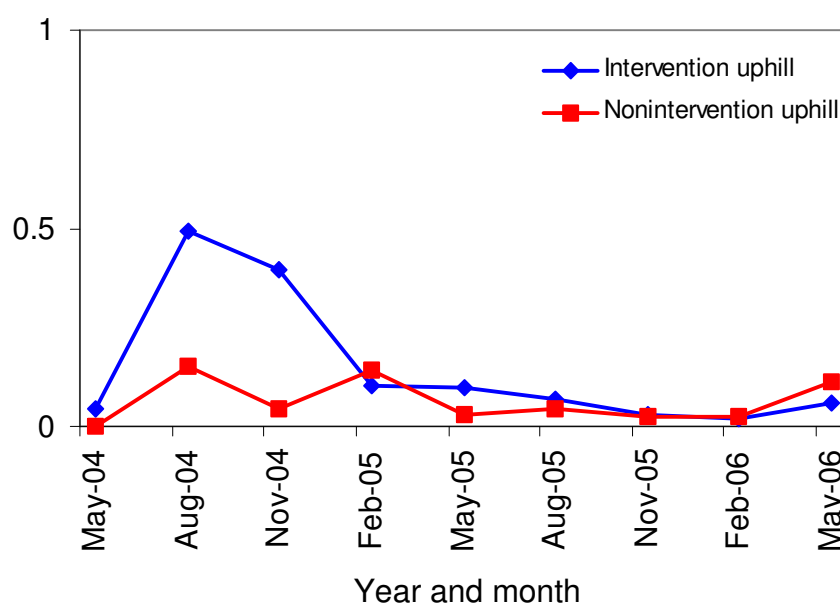

Supplement: MOESM4 [file 9549972]
